# Supplementary material
Source: HighWire-hosted journal article supplement (doi:10.1101/rna.079670.123)
Supplement: Supplemental_Legends.docx [file Supplemental_Legends.docx]

**List of Supplemental Materials**

The data that support the findings of this study are available in the supplemental materials of this article.

**Supplemental_Fig_S1.pdf.** Proposed mechanism for the combination of cleavage and elongation during pfRCT

**Supplemental_Fig_S2.pdf.** Schematic illustration of “One-step strategy” for preparation of circular ssDNA

**Supplemental_Fig_S3.pdf.** Effect of topology on pfRCT efficiency

**Supplemental_Fig_S4.pdf.** Transcription results with (pfRCT) or without (Tr) RNase H

**Supplemental_Fig_S5.pdf.** Electrophoresis results for Fig. 3B, C analyzed by 1% agarose

**Supplemental_Fig_S6.pdf.** Confirmation of the pfRCT products being dsRNA by cleavage by RNase H with the aid of ssDNAs (SDs)

**Supplemental_Fig_S7.pdf.** Comparison of pfRCT velocity between T-B15 and T-B15S

**Supplemental_Fig_S8.pdf.** Transcription results of T-B15S by pfRCT (analyzed by 10% PAGE)

**Supplemental_Fig_S9.pdf.** pfRCT without Helper DNA for small-sized (59 bp) dsDNA templates

**Supplemental_Fig_S10.pdf.** pfRCT in the presence of Helper DNA for small-sized dsDNA template whose bubble with palindromic sequence

**Supplemental_Fig_S11.pdf.** Highly efficient preparation of siRNAs by pfRCT with circular templates with various lengths.

**Supplemental_Fig_S12.pdf.** Effects of sequence symmetry flanking the bubble on the direction bias of T7 RNAP

**Supplemental_Fig_S13.pdf.** Co-transcription using two linear dsDNA templates with a promoter

**Supplemental_Table_S1.pdf.** Sequences of oligomers used in this study
